# Supplementary material for: Intrinsic capacity as a determinant of quality of life trajectories in older Europeans: A sex- and region-sensitive longitudinal analysis using SHARE
Source: Research Square preprint supplement (doi:10.21203/rs.3.rs-9211395/v1), 2026-03-25
Supplement: Supplementary file 1 [file 894ddbd90a37cf1e38de51b0.docx]

**Intrinsic capacity as a determinant of quality of life trajectories in older Europeans: A sex- and region-sensitive longitudinal analysis using SHARE**

**Authors and Affiliations**

Rafael Llorens-Ortegaa <https://orcid-org/0000-0002-0657-4975>; Carmen Bertran-Noguerb <https://orcid.org/0000-0003-2400-7082>; Dolors Juvinyà-Canalc [https://orcid.org/0000-0002-8749-7800](https://orcid.org/0000-0002-8749-7800 ); Josep Garre-Olmob <https://orcid.org/0000-0002-7817-0814>; Cristina Bosch-Farréb <https://orcid.org/0000-0002-3254-6601>

*a* EUIT University Center, Autonomous University of Barcelona (UAB), Cerdanyola del Vallès, Barcelona, Spain

b Nursing Department, University of Girona, Girona, Spain

c Research Group on Health and Healthcare, University of Girona, Girona, Spain

Corresponding Author

**Rafael Llorens-Ortega**
EUIT University Center, Autonomous University of Barcelona, Cerdanyola del Vallès, Spain

Email: [rafallorens@euit.fdsll.cat](mailto:rafallorens@euit.fdsll.cat)

**Supplementary Material**

**Table S1. CASP-12 values at baseline (Wave 5) between participants and a matched sample of non-participants by sex, age, and European region.**

| **Variable** | **Participants**  **(n = 11,493)** | **Non-participants**  **(n = 11,493)** | **p-value** |
| --- | --- | --- | --- |
| Sex |  |  | 1 |
| Male | 5,258 (45.7%) | 5,258 (45.7%) |  |
| Female | 6,235 (54.3%) | 6,235 (54.3%) |  |
| Age (mean ± SD) | 64.2 (±9.82) | 64.2 (±9.82) | 0.979 |
| European region |  |  | 1 |
| Continental | 4,443 (38.7%) | 4,443 (38.7%) |  |
| Northern | 2,747 (23.9%) | 2,747 (23.9%) |  |
| Southern | 2,770 (24.1%) | 2,770 (24.1%) |  |
| Eastern | 1,533 (13.3%) | 1,533 (13.3%) |  |
| CASP-12 (mean ± SD) | 38.3 (±6.29) | 38.2 (±6.19) | 0.385 |

a Values are presented as mean ± standard deviation (SD). European regions: Continental: Austria, Belgium, France, Germany, Luxembourg, and Switzerland; Northern: Denmark and Sweden; Southern: Italy and Spain; Eastern: Czech Republic, Estonia, and Slovenia. CASP-12: Quality of Life and Well-being Index. Scores: below 35 = low quality of life; 35–37 = moderate quality of life; 38–39 = high quality of life; above 39 to 48 = very high quality of life.

**Supplementary Table S2. Pearson Correlations between Intrinsic Capacity Domains and CASP-12**

| Variable | CASP-12 | Hearing | Vision | Total Sensory | Depression | Interest | Irritability | Fatigue | Total Psychological Capacity | Immediate Recall | Delayed Recall | Orientation | Total Cognition | Mobility | ADL | IADL | Total Mobility |
| --- | --- | --- | --- | --- | --- | --- | --- | --- | --- | --- | --- | --- | --- | --- | --- | --- | --- |
| CASP-12 | — |  |  |  |  |  |  |  |  |  |  |  |  |  |  |  |  |
| Hearing | -0.378*** | — |  |  |  |  |  |  |  |  |  |  |  |  |  |  |  |
| Vision | -0.157*** | 0.265*** | — |  |  |  |  |  |  |  |  |  |  |  |  |  |  |
| Total Sensory | -0.317*** | 0.722*** | 0.750*** | — |  |  |  |  |  |  |  |  |  |  |  |  |  |
| Depression | -0.284*** | 0.224*** | 0.076*** | 0.173*** | — |  |  |  |  |  |  |  |  |  |  |  |  |
| Interest | -0.244*** | 0.160*** | 0.060*** | 0.133*** | 0.180*** | — |  |  |  |  |  |  |  |  |  |  |  |
| Irritability | -0.230*** | 0.136*** | 0.063*** | 0.117*** | 0.308*** | 0.123*** | — |  |  |  |  |  |  |  |  |  |  |
| Fatigue | -0.324*** | 0.312*** | 0.132*** | 0.268*** | 0.273*** | 0.182*** | 0.219*** | — |  |  |  |  |  |  |  |  |  |
| Total Psychological Capacity | -0.417*** | 0.327*** | 0.130*** | 0.272*** | 0.733*** | 0.436*** | 0.672*** | 0.686*** | — |  |  |  |  |  |  |  |  |
| Immediate Recall | -0.162*** | 0.156*** | 0.085*** | 0.159*** | 0.010 | 0.094*** | -0.010 | 0.081*** | 0.056*** | — |  |  |  |  |  |  |  |
| Delayed Recall | -0.161*** | 0.158*** | 0.090*** | 0.157*** | 0.032*** | 0.090*** | 0.013 | 0.082*** | 0.075*** | 0.518*** | — |  |  |  |  |  |  |
| Orientation | -0.108*** | 0.108*** | 0.056*** | 0.110*** | 0.059*** | 0.071*** | 0.047*** | 0.073*** | 0.093*** | 0.153*** | 0.183*** | — |  |  |  |  |  |
| Total Cognition | -0.200*** | 0.191*** | 0.105*** | 0.193*** | 0.042*** | 0.117*** | 0.018 | 0.107*** | 0.098*** | 0.822*** | 0.811*** | 0.526*** | — |  |  |  |  |
| Mobility | -0.041*** | 0.033** | 0.019* | 0.034** | -0.002 | 0.010 | 0.017 | 0.010 | 0.013 | 0.039** | 0.028** | 0.013 | 0.038** | — |  |  |  |
| ADL | -0.019* | 0.016 | 0.014 | 0.010 | 0.005 | 0.000 | 0.011 | 0.016 | 0.014 | -0.005 | 0.004 | 0.000 | -0.001 | 0.343*** | — |  |  |
| IADL | -0.035*** | 0.030** | 0.020* | 0.030** | 0.012 | 0.014 | 0.023* | 0.009 | 0.022* | 0.027** | 0.018 | 0.018 | 0.028** | 0.250*** | 0.415*** | — |  |
| Total Mobility | -0.044*** | 0.036*** | 0.024* | 0.034*** | 0.004 | 0.011 | 0.022* | 0.016 | 0.020* | 0.031*** | 0.024** | 0.014 | 0.032*** | 0.843*** | 0.734*** | 0.606*** | — |

Note: Pearson correlation coefficients for intrinsic capacity domains. p* < .05, p** < .01, p*** < .001. Significant correlations reflect associations between quality of life (CASP-12) and intrinsic capacity domains

**Supplementary Table S3. Changes in quality of life according to 2-year changes in intrinsic capacity by sex (Wave 5 to Wave 6).**

|  | **Women** | **95% CI** |  |  | **Men** | **95% CI** |  |  | **Women vs Men** |
| --- | --- | --- | --- | --- | --- | --- | --- | --- | --- |
|  | Mean | Upper | Lower | p-value | Mean | Upper | Lower | p-value | p-value |
| **Locomotion** |  |  |  |  |  |  |  |  |  |
| **No problem** | -0.1922 | -0.4994 | 0.1150 | 0.2201 | -0.0527 | -0.3646 | 0.2593 | 0.7407 | 0.532 |
| **Improved** | 0.9919 | 0.6460 | 1.3378 | <0.0001 | 1.7884 | 1.3569 | 2.2200 | <0.0001 | 0.005 |
| **Worsened** | -2.4336 | -2.7734 | -2.0939 | <0.0001 | -2.6593 | -3.0557 | -2.2629 | <0.0001 | 0.397 |
| **Always poor** | -0.1945 | -0.5495 | 0.1605 | 0.283 | -0.2882 | -0.7707 | 0.1942 | 0.2416 | 0.759 |
| **Limitations ADL** |  |  |  |  |  |  |  |  |  |
| **No problem** | -0.2921 | -0.6063 | 0.0220 | 0.0684 | -0.1460 | -0.4876 | 0.1956 | 0.4023 | 0.537 |
| **Improved** | 1.4361 | 1.0743 | 1.7980 | <0.0001 | 1.6279 | 1.2122 | 2.0436 | <0.0001 | 0.495 |
| **Worsened** | -2.6604 | -3.0468 | -2.2739 | <0.0001 | -2.4591 | -2.8615 | -2.0566 | <0.0001 | 0.479 |
| **Always poor** | -1.9954 | -2.4036 | -1.5872 | <0.0001 | -1.9379 | -2.4140 | -1.4618 | <0.0001 | 0.857 |

Note: Student’s t-test was used for group comparisons (Women vs. Men). ANOVA with post-hoc tests used for differences between groups.

**Supplementary Material – Methodological Note**

**Statistical Analyses**

The supplementary tables (S1–S3) provide additional analyses that reinforce the robustness of the study’s findings. All analyses were conducted using SPSS v.25, with two-tailed significance tests and p < 0.05 as the threshold for statistical significance. Analyses were consistent with those described in the main manuscript to ensure methodological coherence

**Table S1** reports descriptive statistics and group comparisons (t-tests and chi-square tests as appropriate) to evaluate the comparability between participants and a matched non-participant sample at baseline (Wave 5). Variables considered were sex, age, European region, and CASP-12 scores.

**Table S2** presents Pearson correlations between CASP-12 and the domains of intrinsic capacity (IC), including sensory, cognition, mobility, and psychological capacity. Coefficients indicate the strength and direction of associations, with significance levels (p < .05, p < .01, p < .001) clearly noted.

**Table S3** shows changes in CASP-12 quality of life scores over a 2-year period (Wave 5 to Wave 6), stratified by sex and by IC changes (no problem, improved, worsened, always poor). Group differences were assessed using Student’s t-tests (women vs. men) and ANOVA with post-hoc tests for within-group comparisons.

**Interpretation**

**Table S1** confirms the baseline comparability between participants and non-participants, reducing the risk of selection bias.

**Table S2** shows significant associations: poorer sensory, cognitive, mobility, and psychological capacity were consistently correlated with lower CASP-12 quality of life scores.

Table S3 demonstrates that improvements in IC domains are associated with increases in CASP-12, while deterioration corresponds to significant declines, with gender-specific differences observed particularly in locomotion, hearing, and cognition.

**Conclusion**

These supplementary analyses provide additional evidence supporting the validity of the IC construct and its strong relationship with quality of life, while also emphasizing the role of gender in shaping these trajectories.
